# Supplementary material for: Striatal infusion of cholesterol promotes dose‐dependent behavioral benefits and exerts disease‐modifying effects in Huntington's disease mice
Source: PubMed Central journal article supplement (PMC7539329; doi:10.15252/emmm.202012519), 2020-09-22
Supplement: EMMM-12-e12519-s001.pdf [file EMMM-12-e12519-s001.pdf]

## **Striatal infusion of cholesterol promotes dose-dependent behavioral benefits and exerts disease-modifying effects in Huntington's disease mice**

Giulia Birolini<sup>1,2‡</sup>, Marta Valenza<sup>1,2‡\*</sup>, Eleonora Di Paolo<sup>1,2‡</sup>, Elena Vezzoli<sup>1,2,†</sup>, Francesca Talpo<sup>3</sup>, Claudia Maniezzi<sup>3</sup>, Claudio Caccia<sup>4</sup>, Valerio Leoni<sup>5</sup>, Vittoria D. Bocchi<sup>1,2</sup>, Paola Conforti<sup>1,2</sup>, Elisa Sogne<sup>6</sup>, Lara Petricca<sup>7</sup>, Cristina Cariulo<sup>7</sup>, Margherita Verani<sup>7</sup>, Andrea Caricasole<sup>7</sup>, Andrea Falqui<sup>6</sup>, Gerardo Biella<sup>3</sup>, Elena Cattaneo<sup>1,2\*</sup>

Appendix – table of content:

Appendix Figure S1

Appendix Figure S2

Appendix Table S3

# Appendix Figure S1

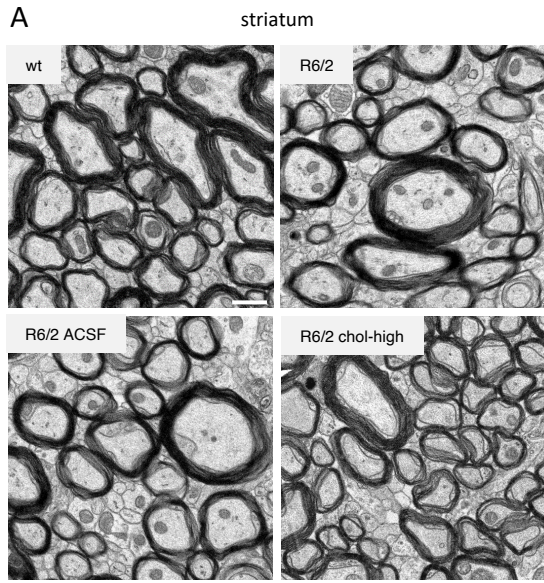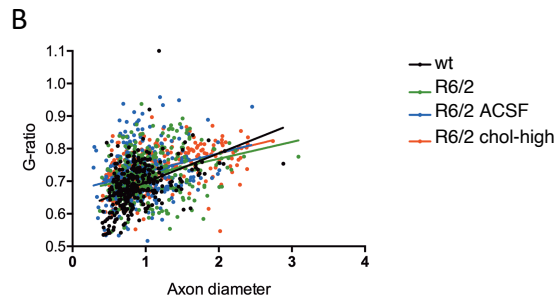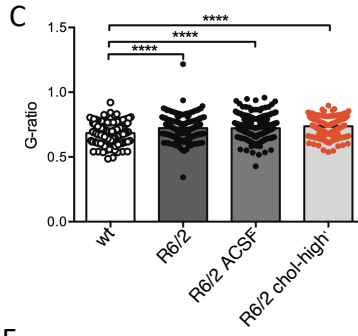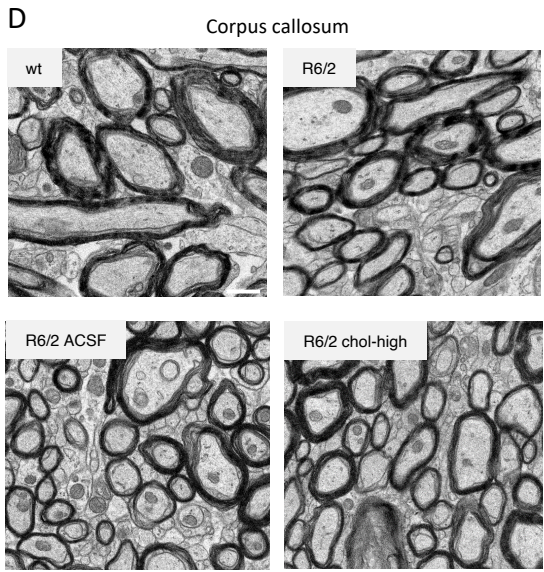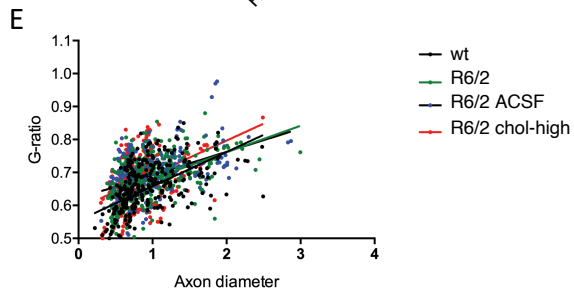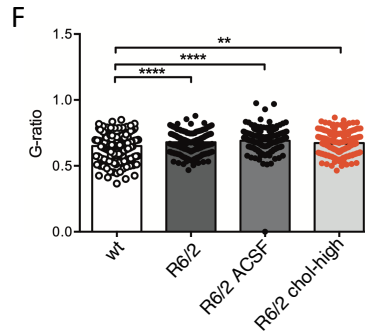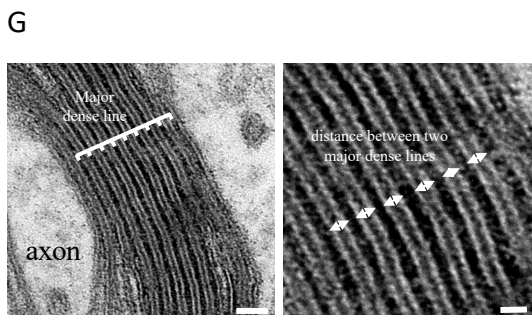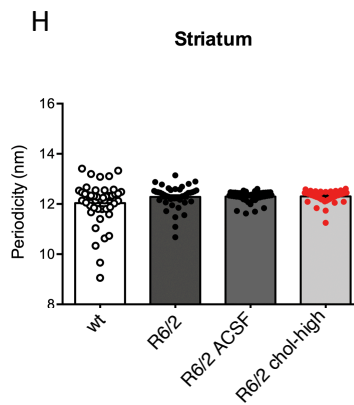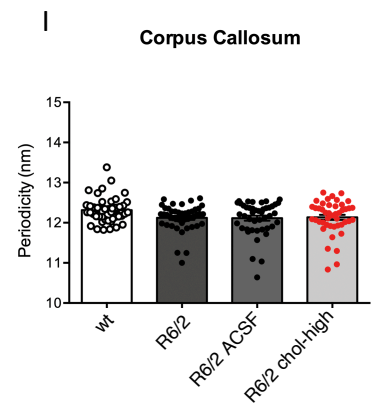

# Appendix Figure S2

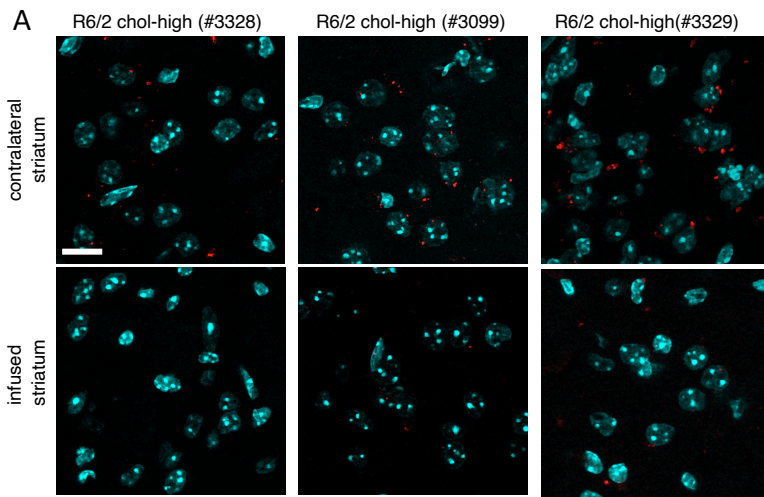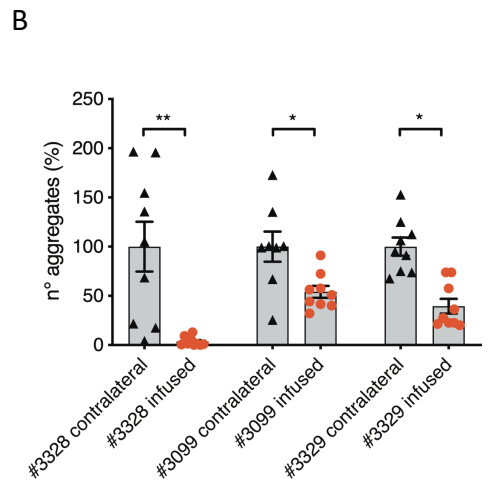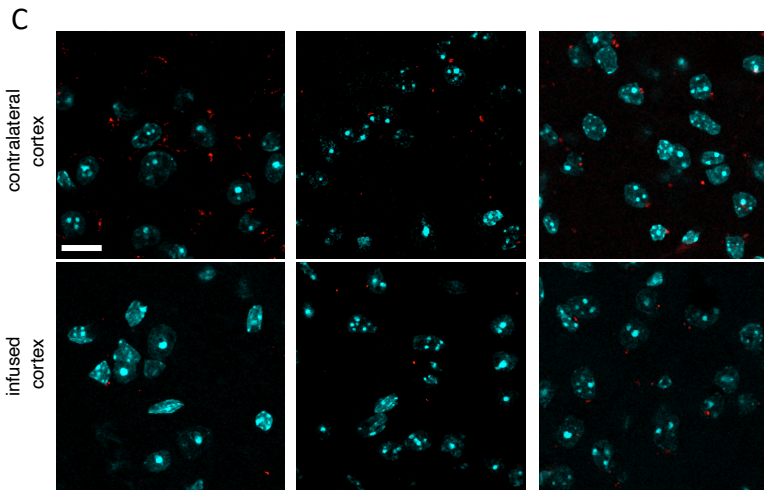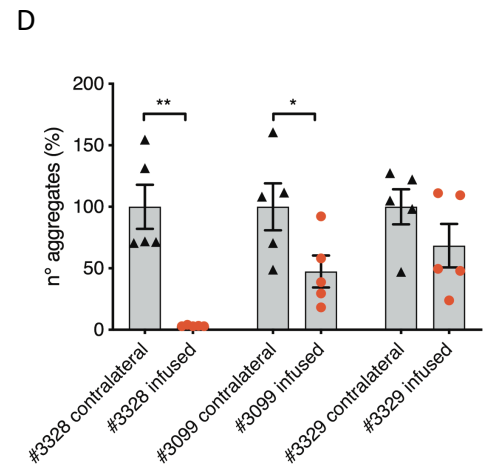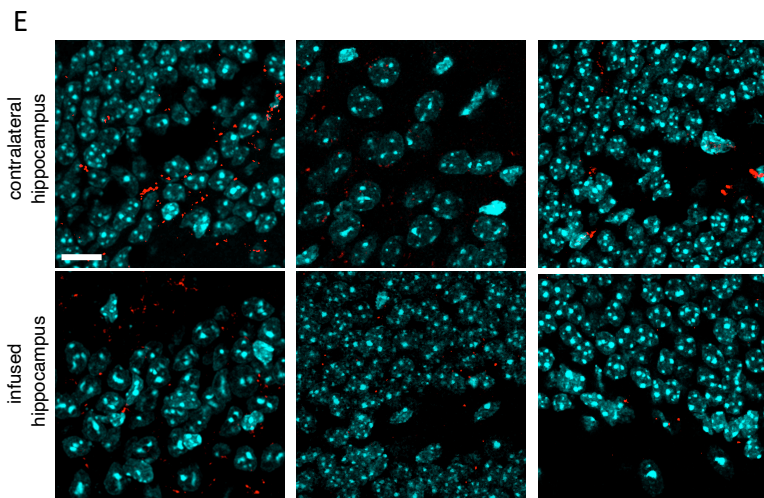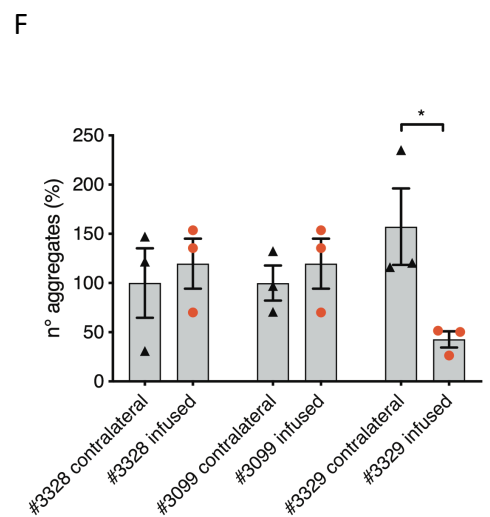

### Appendix S3 - Summary of statistics for the main figures

| <b>FIGURE 1C</b>                                                  |            |              |         |
|-------------------------------------------------------------------|------------|--------------|---------|
| ANOVA summary                                                     |            |              |         |
| F                                                                 | 9,635      |              |         |
| P value                                                           | < 0,0001   |              |         |
| P value summary                                                   | ****       |              |         |
| Are differences among means statistically significant? (P < 0.05) | Yes        |              |         |
| R square                                                          | 0,6769     |              |         |
| Newman-Keuls multiple comparisons test                            |            |              |         |
|                                                                   | Mean Diff, | Significant? | Summary |
| wt vs. R6/2-ACSF                                                  | 15,05      | Yes          | **      |
| wt vs. R6/2-chol (low)                                            | 6,229      | No           | ns      |
| wt vs. R6/2-chol (medium)                                         | -6,886     | No           | ns      |
| wt vs. R6/2-chol (high)                                           | -9,614     | No           | ns      |
| R6/2-ACSF vs. R6/2-chol (low)                                     | -8,819     | No           | ns      |
| R6/2-ACSF vs. R6/2-chol (medium)                                  | -21,93     | Yes          | **      |
| R6/2-ACSF vs. R6/2-chol (high)                                    | -24,66     | Yes          | ***     |
| R6/2-chol (low) vs. R6/2-chol (medium)                            | -13,12     | No           | ns      |
| R6/2-chol (low) vs. R6/2-chol (high)                              | -15,84     | Yes          | *       |
| R6/2-chol (medium) vs. R6/2-chol (high)                           | -2,727     | No           | ns      |

| <b>FIGURE 1D</b>                                                  |            |              |         |
|-------------------------------------------------------------------|------------|--------------|---------|
| ANOVA summary - Rotarod 8 weeks                                   |            |              |         |
| F                                                                 | 5,132      |              |         |
| P value                                                           | 0,001      |              |         |
| P value summary                                                   | ***        |              |         |
| Are differences among means statistically significant? (P < 0.05) | Yes        |              |         |
| R square                                                          | 0,2002     |              |         |
| Newman-Keuls multiple comparisons test                            |            |              |         |
|                                                                   | Mean Diff, | Significant? | Summary |
| wt vs. R6/2-ACSF                                                  | 87,77      | Yes          | ***     |
| wt vs. R6/2-chol (low)                                            | 80,01      | Yes          | **      |
| wt vs. R6/2-chol (medium)                                         | 78,59      | Yes          | *       |
| wt vs. R6/2-chol (high)                                           | 51,56      | Yes          | *       |
| R6/2-ACSF vs. R6/2-chol (low)                                     | -7,767     | No           | ns      |
| R6/2-ACSF vs. R6/2-chol (medium)                                  | -9,188     | No           | ns      |
| R6/2-ACSF vs. R6/2-chol (high)                                    | -36,21     | No           | ns      |
| R6/2-chol (low) vs. R6/2-chol (medium)                            | -1,421     | No           | ns      |
| R6/2-chol (low) vs. R6/2-chol (high)                              | -28,45     | No           | ns      |
| R6/2-chol (medium) vs. R6/2-chol (high)                           | -27,02     | No           | ns      |
| ANOVA summary - Rotarod 10 weeks                                  |            |              |         |
| F                                                                 | 33,78      |              |         |
| P value                                                           | < 0,0001   |              |         |
| P value summary                                                   | ****       |              |         |
| Are differences among means statistically significant? (P < 0.05) | Yes        |              |         |
| R square                                                          | 0,634      |              |         |
| Newman-Keuls multiple comparisons test                            |            |              |         |
|                                                                   | Mean Diff, | Significant? | Summary |
| wt vs. R6/2-ACSF                                                  | 161,4      | Yes          | ****    |
| wt vs. R6/2-chol (low)                                            | 170,6      | Yes          | ****    |
| wt vs. R6/2-chol (medium)                                         | 158,1      | Yes          | ****    |
| wt vs. R6/2-chol (high)                                           | 116,6      | Yes          | ****    |
| R6/2-ACSF vs. R6/2-chol (low)                                     | 9,271      | No           | ns      |
| R6/2-ACSF vs. R6/2-chol (medium)                                  | -3,283     | No           | ns      |
| R6/2-ACSF vs. R6/2-chol (high)                                    | -44,72     | Yes          | *       |
| R6/2-chol (low) vs. R6/2-chol (medium)                            | -12,55     | No           | ns      |
| R6/2-chol (low) vs. R6/2-chol (high)                              | -53,99     | Yes          | *       |
| R6/2-chol (medium) vs. R6/2-chol (high)                           | -41,44     | No           | ns      |

| <b>FIGURE 1E</b>                         |         |  |  |
|------------------------------------------|---------|--|--|
| ANOVA summary - Global activity 11 weeks |         |  |  |
| F                                        | 13,45   |  |  |
| P value                                  | <0,0001 |  |  |
| P value summary                          | ****    |  |  |

|                                               |            |              |         |
|-----------------------------------------------|------------|--------------|---------|
| Significant diff. among means (P < 0.05)?     | Yes        |              |         |
| R squared                                     | 0,4476     |              |         |
| <b>Newman-Keuls multiple comparisons test</b> |            |              |         |
|                                               | Mean Diff, | Significant? | Summary |
| wt vs. R6/2-ASCF                              | 5571       | Yes          | ****    |
| wt vs. R6/2-chol (low)                        | 6087       | Yes          | ****    |
| wt vs. R6/2-chol (medium)                     | 4561       | Yes          | **      |
| wt vs. R6/2-chol (high)                       | 1555       | No           | ns      |
| R6/2-ASCF vs. R6/2-chol (low)                 | 515,8      | No           | ns      |
| R6/2-ASCF vs. R6/2-chol (medium)              | -1010      | No           | ns      |
| R6/2-ASCF vs. R6/2-chol (high)                | -4016      | Yes          | ***     |
| R6/2-chol (low) vs. R6/2-chol (medium)        | -1526      | No           | ns      |
| R6/2-chol (low) vs. R6/2-chol (high)          | -4532      | Yes          | ***     |
| R6/2-chol (medium) vs. R6/2-chol (high)       | -3006      | Yes          | *       |

|                                               |            |              |         |
|-----------------------------------------------|------------|--------------|---------|
| <b>FIGURE 1F</b>                              |            |              |         |
| ANOVA summary - Distance 11 weeks             |            |              |         |
| F                                             | 13,17      |              |         |
| P value                                       | <0,0001    |              |         |
| P value summary                               | ****       |              |         |
| Significant diff. among means (P < 0.05)?     | Yes        |              |         |
| R squared                                     | 0,4126     |              |         |
| <b>Newman-Keuls multiple comparisons test</b> |            |              |         |
|                                               | Mean Diff, | Significant? | Summary |
| wt vs. R6/2-ASCF                              | 7035       | Yes          | ****    |
| wt vs. R6/2-chol (low)                        | 7478       | Yes          | ****    |
| wt vs. R6/2-chol (medium)                     | 6050       | Yes          | **      |
| wt vs. R6/2-chol (high)                       | 3380       | Yes          | **      |
| R6/2-ASCF vs. R6/2-chol (low)                 | 442,2      | No           | ns      |
| R6/2-ASCF vs. R6/2-chol (medium)              | -985,1     | No           | ns      |
| R6/2-ASCF vs. R6/2-chol (high)                | -3656      | Yes          | **      |
| R6/2-chol (low) vs. R6/2-chol (medium)        | -1427      | No           | ns      |
| R6/2-chol (low) vs. R6/2-chol (high)          | -4098      | Yes          | *       |
| R6/2-chol (medium) vs. R6/2-chol (high)       | -2671      | No           | ns      |

|                                               |            |              |         |
|-----------------------------------------------|------------|--------------|---------|
| <b>FIGURE 1G</b>                              |            |              |         |
| ANOVA summary - Vel Mean 11 weeks             |            |              |         |
| F                                             | 16,58      |              |         |
| P value                                       | <0,0001    |              |         |
| P value summary                               | ****       |              |         |
| Significant diff. among means (P < 0.05)?     | Yes        |              |         |
| R squared                                     | 0,4693     |              |         |
| <b>Newman-Keuls multiple comparisons test</b> |            |              |         |
|                                               | Mean Diff, | Significant? | Summary |
| wt vs. R6/2-ASCF                              | 2,042      | Yes          | ****    |
| wt vs. R6/2-chol (low)                        | 2,238      | Yes          | ****    |
| wt vs. R6/2-chol (medium)                     | 1,283      | Yes          | **      |
| wt vs. R6/2-chol (high)                       | 1,042      | Yes          | **      |
| R6/2-ASCF vs. R6/2-chol (low)                 | 0,1964     | No           | ns      |
| R6/2-ASCF vs. R6/2-chol (medium)              | -0,7584    | No           | ns      |
| R6/2-ASCF vs. R6/2-chol (high)                | -0,9995    | Yes          | **      |
| R6/2-chol (low) vs. R6/2-chol (medium)        | -0,9548    | No           | ns      |
| R6/2-chol (low) vs. R6/2-chol (high)          | -1,196     | Yes          | **      |
| R6/2-chol (medium) vs. R6/2-chol (high)       | -0,2411    | No           | ns      |

|                                               |            |              |         |
|-----------------------------------------------|------------|--------------|---------|
| <b>FIGURE 1H</b>                              |            |              |         |
| ANOVA summary - Stereotyped Mov 11 weeks      |            |              |         |
| F                                             | 14,63      |              |         |
| P value                                       | <0,0001    |              |         |
| P value summary                               | ****       |              |         |
| Significant diff. among means (P < 0.05)?     | Yes        |              |         |
| R squared                                     | 0,4383     |              |         |
| <b>Newman-Keuls multiple comparisons test</b> |            |              |         |
|                                               | Mean Diff, | Significant? | Summary |
| wt vs. R6/2-ASCF                              | 442,1      | Yes          | ****    |
| wt vs. R6/2-chol (low)                        | 555,2      | Yes          | ****    |
| wt vs. R6/2-chol (medium)                     | 421        | Yes          | ***     |
| wt vs. R6/2-chol (high)                       | 206,3      | Yes          | *       |
| R6/2-ASCF vs. R6/2-chol (low)                 | 113,1      | No           | ns      |
| R6/2-ASCF vs. R6/2-chol (medium)              | -21,08     | No           | ns      |
| R6/2-ASCF vs. R6/2-chol (high)                | -235,8     | Yes          | *       |

|                                         |        |     |    |
|-----------------------------------------|--------|-----|----|
| R6/2-choI (low) vs. R6/2-choI (medium)  | -134,2 | No  | ns |
| R6/2-choI (low) vs. R6/2-choI (high)    | -348,9 | Yes | ** |
| R6/2-choI (medium) vs. R6/2-choI (high) | -214,8 | No  | ns |

| <b>FIGURE 1I</b>                          |                |              |         |
|-------------------------------------------|----------------|--------------|---------|
| ANOVA summary - Rearings 11 weeks         |                |              |         |
| F                                         | 16,59          |              |         |
| P value                                   | <0,0001        |              |         |
| P value summary                           | ****           |              |         |
| Significant diff. among means (P < 0.05)? | Yes            |              |         |
| R squared                                 | 0,4694         |              |         |
| Newman-Keuls multiple comparisons test    |                |              |         |
|                                           | Mean Diff,     | Significant? | Summary |
| wt vs. R6/2-ACSF                          | 407,7          | Yes          | ****    |
| wt vs. R6/2-choI (low)                    | 378,3          | Yes          | ****    |
| wt vs. R6/2-choI (medium)                 | 350,5          | Yes          | ***     |
| wt vs. R6/2-choI (high)                   | 288,3          | Yes          | ****    |
| R6/2-ACSF vs. R6/2-choI (low)             | -29,42         | No           | ns      |
| R6/2-ACSF vs. R6/2-choI (medium)          | -57,23         | No           | ns      |
| R6/2-ACSF vs. R6/2-choI (high)            | -119,5         | No           | ns      |
| R6/2-choI (low) vs. R6/2-choI (medium)    | -27,81         | No           | ns      |
| R6/2-choI (low) vs. R6/2-choI (high)      | -90,04         | No           | ns      |
| R6/2-choI (medium) vs. R6/2-choI (high)   | -62,23         | No           | ns      |
| R6/2-choI (high) vs R6/2-ACSF             |                |              |         |
| Unpaired t test                           |                |              |         |
| P value                                   | 0,0419         |              |         |
| P value summary                           | #              |              |         |
| Significantly different (P < 0.05)?       | Yes            |              |         |
| One- or two-tailed P value?               | Two-tailed     |              |         |
| t, df                                     | t=2,108, df=37 |              |         |

| <b>FIGURE 1K</b>                             |            |              |         |
|----------------------------------------------|------------|--------------|---------|
| ANOVA summary - Center vs Periphery 11 weeks |            |              |         |
| F                                            | 10,06      |              |         |
| P value                                      | <0,0001    |              |         |
| P value summary                              | ****       |              |         |
| Significant diff. among means (P < 0.05)?    | Yes        |              |         |
| R squared                                    | 0,3651     |              |         |
| Newman-Keuls multiple comparisons test       |            |              |         |
|                                              | Mean Diff, | Significant? | Summary |
| wt vs. R6/2-ACSF                             | 12,25      | Yes          | ***     |
| wt vs. R6/2-choI (low)                       | 14,96      | Yes          | **      |
| wt vs. R6/2-choI (medium)                    | 8,864      | No           | ns      |
| wt vs. R6/2-choI (high)                      | -5,886     | No           | ns      |
| R6/2-ACSF vs. R6/2-choI (low)                | 2,717      | No           | ns      |
| R6/2-ACSF vs. R6/2-choI (medium)             | -3,383     | No           | ns      |
| R6/2-ACSF vs. R6/2-choI (high)               | -18,13     | Yes          | ****    |
| R6/2-choI (low) vs. R6/2-choI (medium)       | -6,1       | No           | ns      |
| R6/2-choI (low) vs. R6/2-choI (high)         | -20,85     | Yes          | ***     |
| R6/2-choI (medium) vs. R6/2-choI (high)      | -14,75     | Yes          | **      |

| <b>FIGURE 1L</b>                          |            |              |         |
|-------------------------------------------|------------|--------------|---------|
| ANOVA summary - NORT 11 weeks             |            |              |         |
| F                                         | 6,031      |              |         |
| P value                                   | 0,0003     |              |         |
| P value summary                           | ***        |              |         |
| Significant diff. among means (P < 0.05)? | Yes        |              |         |
| R squared                                 | 0,2434     |              |         |
| Newman-Keuls multiple comparisons test    |            |              |         |
|                                           | Mean Diff, | Significant? | Summary |
| wt vs. R6/2-ACSF                          | 31,91      | Yes          | ***     |
| wt vs. R6/2-choI (low)                    | 3,245      | No           | ns      |
| wt vs. R6/2-choI (medium)                 | 3,101      | No           | ns      |
| wt vs. R6/2-choI (high)                   | 2,28       | No           | ns      |
| R6/2-ACSF vs. R6/2-choI (low)             | -28,66     | Yes          | **      |
| R6/2-ACSF vs. R6/2-choI (medium)          | -28,81     | Yes          | *       |
| R6/2-ACSF vs. R6/2-choI (high)            | -29,63     | Yes          | **      |
| R6/2-choI (low) vs. R6/2-choI (medium)    | -0,1444    | No           | ns      |
| R6/2-choI (low) vs. R6/2-choI (high)      | -0,9654    | No           | ns      |
| R6/2-choI (medium) vs. R6/2-choI (high)   | -0,8209    | No           | ns      |

| <b>FIGURE 2D</b>                          |            |              |         |
|-------------------------------------------|------------|--------------|---------|
| ANOVA summary                             |            |              |         |
| F                                         | 37,74      |              |         |
| P value                                   | <0,0001    |              |         |
| P value summary                           | ****       |              |         |
| Significant diff. among means (P < 0.05)? | Yes        |              |         |
| R squared                                 | 0,8531     |              |         |
|                                           |            |              |         |
| Newman-Keuls multiple comparisons test    | Mean Diff, | Significant? | Summary |
| wt vs. R6/2-ACSF                          | 1,817      | Yes          | ****    |
| wt vs. R6/2-chol                          | 1,189      | Yes          | ****    |
| R6/2-ACSF vs. R6/2-chol                   | -0,6276    | Yes          | *       |

| <b>FIGURE 2G</b>                          |            |              |         |
|-------------------------------------------|------------|--------------|---------|
| ANOVA summary                             |            |              |         |
| F                                         | 10,15      |              |         |
| P value                                   | <0,0001    |              |         |
| P value summary                           | ****       |              |         |
| Significant diff. among means (P < 0.05)? | Yes        |              |         |
| R squared                                 | 0,14       |              |         |
|                                           |            |              |         |
| Newman-Keuls multiple comparisons test    | Mean Diff, | Significant? | Summary |
| wt vs. R6/2                               | 0,1492     | Yes          | ***     |
| wt vs. R6/2-ACSF                          | 0,1537     | Yes          | ***     |
| wt vs. R6/2-chol                          | 0,2027     | Yes          | ****    |
| R6/2 vs. R6/2-ACSF                        | 0,004505   | No           | ns      |
| R6/2 vs. R6/2-chol                        | 0,05353    | No           | ns      |
| R6/2-ACSF vs. R6/2-chol                   | 0,04903    | No           | ns      |

| <b>FIGURE 2J</b>                          |            |              |         |
|-------------------------------------------|------------|--------------|---------|
| ANOVA summary                             |            |              |         |
| F                                         | 20,24      |              |         |
| P value                                   | <0,0001    |              |         |
| P value summary                           | ****       |              |         |
| Significant diff. among means (P < 0.05)? | Yes        |              |         |
| R squared                                 | 0,2089     |              |         |
|                                           |            |              |         |
| Newman-Keuls multiple comparisons test    | Mean Diff, | Significant? | Summary |
| wt vs. R6/2                               | 42         | Yes          | ****    |
| wt vs. R6/2 ACSF                          | 33,38      | Yes          | ****    |
| wt vs. R6/2-chol                          | 12,77      | Yes          | *       |
| R6/2 vs. R6/2 ACSF                        | -8,618     | No           | ns      |
| R6/2 vs. R6/2-chol                        | -29,23     | Yes          | ****    |
| R6/2 ACSF vs. R6/2-chol                   | -20,61     | Yes          | ***     |

| <b>FIGURE 2K</b>                          |            |              |         |
|-------------------------------------------|------------|--------------|---------|
| ANOVA summary                             |            |              |         |
| F                                         | 5,643      |              |         |
| P value                                   | 0,0009     |              |         |
| P value summary                           | ***        |              |         |
| Significant diff. among means (P < 0.05)? | Yes        |              |         |
| R squared                                 | 0,06693    |              |         |
|                                           |            |              |         |
| Newman-Keuls multiple comparisons test    | Mean Diff, | Significant? | Summary |
| wt vs. R6/2                               | 1,203      | Yes          | *       |
| wt vs. R6/2-ACSF                          | 1,154      | Yes          | **      |
| wt vs. R6/2-chol                          | 0,1562     | No           | ns      |
| R6/2 vs. R6/2-ACSF                        | -0,04863   | No           | ns      |
| R6/2 vs. R6/2-chol                        | -1,046     | Yes          | *       |
| R6/2-ACSF vs. R6/2-chol                   | -0,9978    | Yes          | **      |

| <b>FIGURE 3C</b>                          |            |              |         |
|-------------------------------------------|------------|--------------|---------|
| ANOVA summary                             |            |              |         |
| F                                         | 14,85      |              |         |
| P value                                   | 0,0003     |              |         |
| P value summary                           | ***        |              |         |
| Significant diff. among means (P < 0.05)? | Yes        |              |         |
| R squared                                 | 0,6644     |              |         |
|                                           |            |              |         |
| Newman-Keuls multiple comparisons test    | Mean Diff, | Significant? | Summary |

|                         |         |     |     |
|-------------------------|---------|-----|-----|
| wt vs. R6/2-ACSF        | -1,212  | Yes | *** |
| wt vs. R6/2-chol        | 0,06288 | No  | ns  |
| R6/2-ACSF vs. R6/2-chol | 1,275   | Yes | *** |

| <b>FIGURE 3E</b>                          |            |              |         |
|-------------------------------------------|------------|--------------|---------|
| ANOVA summary                             |            |              |         |
| F                                         | 8,363      |              |         |
| P value                                   | 0,0001     |              |         |
| P value summary                           | ***        |              |         |
| Significant diff. among means (P < 0.05)? | Yes        |              |         |
| R squared                                 | 0,3213     |              |         |
| Newman-Keuls multiple comparisons test    |            |              |         |
|                                           | Mean Diff, | Significant? | Summary |
| wt vs. R6/2                               | -0,01566   | Yes          | ***     |
| wt vs. R6/2-ACSF                          | -0,013     | Yes          | **      |
| wt vs. R6/2-chol                          | -0,002188  | No           | ns      |
| R6/2 vs. R6/2-ACSF                        | 0,002663   | No           | ns      |
| R6/2 vs. R6/2-chol                        | 0,01348    | Yes          | **      |
| R6/2-ACSF vs. R6/2-chol                   | 0,01081    | Yes          | **      |

| <b>FIGURE 4B</b>                                                  |            |              |         |
|-------------------------------------------------------------------|------------|--------------|---------|
| ANOVA summary - contralateral striatum                            |            |              |         |
| F                                                                 | 67,45      |              |         |
| P value                                                           | < 0,0001   |              |         |
| P value summary                                                   | ****       |              |         |
| Are differences among means statistically significant? (P < 0.05) | Yes        |              |         |
| R square                                                          | 0,9375     |              |         |
| Newman-Keuls multiple comparisons test                            |            |              |         |
|                                                                   | Mean Diff, | Significant? | Summary |
| wt vs. R6/2-ASCF                                                  | 29,55      | Yes          | ****    |
| wt vs. R6/2-Chol                                                  | 44,2       | Yes          | ****    |
| R6/2-ASCF vs. R6/2-Chol                                           | 14,64      | Yes          | **      |
| ANOVA summary - infused striatum                                  |            |              |         |
| F                                                                 | 23,75      |              |         |
| P value                                                           | 0,0003     |              |         |
| P value summary                                                   | ***        |              |         |
| Are differences among means statistically significant? (P < 0.05) | Yes        |              |         |
| R square                                                          | 0,8407     |              |         |
| Newman-Keuls multiple comparisons test                            |            |              |         |
|                                                                   | Mean Diff, | Significant? | Summary |
| wt vs. R6/2-ASCF                                                  | 19,74      | Yes          | **      |
| wt vs. R6/2-Chol                                                  | -18,3      | Yes          | **      |
| R6/2-ASCF vs. R6/2-Chol                                           | -38,04     | Yes          | ***     |

| <b>FIGURE 4C</b>                                                  |            |              |         |
|-------------------------------------------------------------------|------------|--------------|---------|
| ANOVA summary - contralateral striatum                            |            |              |         |
| F                                                                 | 89,53      |              |         |
| P value                                                           | < 0,0001   |              |         |
| P value summary                                                   | ****       |              |         |
| Are differences among means statistically significant? (P < 0.05) | Yes        |              |         |
| R square                                                          | 0,9521     |              |         |
| Newman-Keuls multiple comparisons test                            |            |              |         |
|                                                                   | Mean Diff, | Significant? | Summary |
| wt vs. R6/2-ASCF                                                  | 76,57      | Yes          | ****    |
| wt vs. R6/2-Chol                                                  | 76,88      | Yes          | ****    |
| R6/2-ASCF vs. R6/2-Chol                                           | 0,3097     | No           | ns      |
| ANOVA summary - infused striatum                                  |            |              |         |
| F                                                                 | 52,46      |              |         |
| P value                                                           | < 0,0001   |              |         |
| P value summary                                                   | ****       |              |         |
| Are differences among means statistically significant? (P < 0.05) | Yes        |              |         |
| R square                                                          | 0,921      |              |         |
| Newman-Keuls multiple comparisons test                            |            |              |         |
|                                                                   | Mean Diff, | Significant? | Summary |
| wt vs. R6/2-ASCF                                                  | 73,2       | Yes          | ****    |



|                         |      |     |     |
|-------------------------|------|-----|-----|
| wt vs. R6/2-Chol        | 46,2 | Yes | *** |
| R6/2-ASCF vs. R6/2-Chol | -27  | Yes | **  |

**FIGURE 4D**

|                                                                   |            |              |         |
|-------------------------------------------------------------------|------------|--------------|---------|
| ANOVA summary - contralateral striatum                            |            |              |         |
| F                                                                 | 212,1      |              |         |
| P value                                                           | < 0,0001   |              |         |
| P value summary                                                   | ****       |              |         |
| Are differences among means statistically significant? (P < 0.05) | Yes        |              |         |
| R square                                                          | 0,9792     |              |         |
| Newman-Keuls multiple comparisons test                            |            |              |         |
|                                                                   | Mean Diff, | Significant? | Summary |
| wt vs. R6/2-ASCF                                                  | 71,21      | Yes          | ****    |
| wt vs. R6/2-Chol                                                  | 69,49      | Yes          | ****    |
| R6/2-ASCF vs. R6/2-Chol                                           | -1,711     | No           | ns      |
| ANOVA summary - infused striatum                                  |            |              |         |
| F                                                                 | 23,16      |              |         |
| P value                                                           | 0,0003     |              |         |
| P value summary                                                   | ***        |              |         |
| Are differences among means statistically significant? (P < 0.05) | Yes        |              |         |
| R square                                                          | 0,8373     |              |         |
| Newman-Keuls multiple comparisons test                            |            |              |         |
|                                                                   | Mean Diff, | Significant? | Summary |
| wt vs. R6/2-ASCF                                                  | 59,22      | Yes          | ***     |
| wt vs. R6/2-Chol                                                  | 8,048      | No           | ns      |
| R6/2-ASCF vs. R6/2-Chol                                           | -51,17     | Yes          | ***     |

**FIGURE 4E**

|                                                                   |            |              |         |
|-------------------------------------------------------------------|------------|--------------|---------|
| ANOVA summary - contralateral striatum                            |            |              |         |
| F                                                                 | 8,488      |              |         |
| P value                                                           | 0,0085     |              |         |
| P value summary                                                   | **         |              |         |
| Are differences among means statistically significant? (P < 0.05) | Yes        |              |         |
| R square                                                          | 0,6535     |              |         |
| Newman-Keuls multiple comparisons test                            |            |              |         |
|                                                                   | Mean Diff, | Significant? | Summary |
| wt vs. R6/2-ASCF                                                  | 26,6       | Yes          | *       |
| wt vs. R6/2-Chol                                                  | 32,73      | Yes          | **      |
| R6/2-ASCF vs. R6/2-Chol                                           | 6,137      | No           | ns      |
| ANOVA summary - infused striatum                                  |            |              |         |
| F                                                                 | 9,097      |              |         |
| P value                                                           | 0,0069     |              |         |
| P value summary                                                   | **         |              |         |
| Are differences among means statistically significant? (P < 0.05) | Yes        |              |         |
| R square                                                          | 0,669      |              |         |
| Newman-Keuls multiple comparisons test                            |            |              |         |
|                                                                   | Mean Diff, | Significant? | Summary |
| wt vs. R6/2-ASCF                                                  | 11,66      | No           | ns      |
| wt vs. R6/2-Chol                                                  | -35,89     | Yes          | *       |
| R6/2-ASCF vs. R6/2-Chol                                           | -47,55     | Yes          | **      |

**FIGURE 4G and 4I**

|                                                            |               |  |  |
|------------------------------------------------------------|---------------|--|--|
| R6/2 vs wt                                                 |               |  |  |
| Unpaired t test                                            |               |  |  |
| P value                                                    | <0,0001       |  |  |
| P value summary                                            | ****          |  |  |
| Significantly different (P < 0.05)?                        | Yes           |  |  |
| One- or two-tailed P value?                                | Two-tailed    |  |  |
| t, df                                                      | t=8,618, df=8 |  |  |
| R6/2 chol high (infused) vs R6/2 chol high (contralateral) |               |  |  |
| Unpaired t test                                            |               |  |  |
| P value                                                    | 0,001         |  |  |
| P value summary                                            | **            |  |  |
| Significantly different (P < 0.05)?                        | Yes           |  |  |

|                             |                |  |  |
|-----------------------------|----------------|--|--|
| One- or two-tailed P value? | Two-tailed     |  |  |
| t, df                       | t=4,432, df=11 |  |  |

  

|                                           |                  |                 |            |
|-------------------------------------------|------------------|-----------------|------------|
| <b>FIGURE 5B</b>                          |                  |                 |            |
| ANOVA summary                             |                  |                 |            |
| F                                         | 12,14            |                 |            |
| P value                                   | <0,0001          |                 |            |
| P value summary                           | ****             |                 |            |
| Significant diff. among means (P < 0.05)? | Yes              |                 |            |
| R squared                                 | 0,2651           |                 |            |
| Newman-Keuls multiple comparisons test    |                  |                 |            |
| ACSF contralateral vs. ACSF infused       | Mean Diff, 14,74 | Significant? No | Summary ns |
| ACSF contralateral vs. Chol contralateral | -4,615E-10       | No              | ns         |
| ACSF contralateral vs. Chol infused       | 67,62            | Yes             | ****       |
| ACSF infused vs. Chol contralateral       | -14,74           | No              | ns         |
| ACSF infused vs. Chol infused             | 52,88            | Yes             | ****       |
| Chol contralateral vs. Chol infused       | 67,62            | Yes             | ****       |

  

|                                           |                    |                 |            |
|-------------------------------------------|--------------------|-----------------|------------|
| <b>FIGURE 5C</b>                          |                    |                 |            |
| ANOVA summary                             |                    |                 |            |
| F                                         | 4,5                |                 |            |
| P value                                   | 0,0053             |                 |            |
| P value summary                           | **                 |                 |            |
| Significant diff. among means (P < 0.05)? | Yes                |                 |            |
| R squared                                 | 0,1179             |                 |            |
| Newman-Keuls multiple comparisons test    |                    |                 |            |
| ACSF contralateral vs. ACSF infused       | Mean Diff, -0,2515 | Significant? No | Summary ns |
| ACSF contralateral vs. Chol contralateral | -0,27              | No              | ns         |
| ACSF contralateral vs. Chol infused       | 0,9782             | Yes             | *          |
| ACSF infused vs. Chol contralateral       | -0,01846           | No              | ns         |
| ACSF infused vs. Chol infused             | 1,23               | Yes             | **         |
| Chol contralateral vs. Chol infused       | 1,248              | Yes             | *          |

  

|                                     |                |  |  |
|-------------------------------------|----------------|--|--|
| <b>FIGURE 5E</b>                    |                |  |  |
| Chol infused vs Chol contralateral  |                |  |  |
| Unpaired t test                     |                |  |  |
| P value                             | <0,0001        |  |  |
| P value summary                     | ****           |  |  |
| Significantly different (P < 0.05)? | Yes            |  |  |
| One- or two-tailed P value?         | Two-tailed     |  |  |
| t, df                               | t=5,281, df=28 |  |  |

  

|                                     |                |  |  |
|-------------------------------------|----------------|--|--|
| <b>FIGURE 5G</b>                    |                |  |  |
| Chol infused vs Chol contralateral  |                |  |  |
| Unpaired t test                     |                |  |  |
| P value                             | <0,0001        |  |  |
| P value summary                     | ****           |  |  |
| Significantly different (P < 0.05)? | Yes            |  |  |
| One- or two-tailed P value?         | Two-tailed     |  |  |
| t, df                               | t=4,738, df=28 |  |  |

  

|                                         |                          |  |  |
|-----------------------------------------|--------------------------|--|--|
| <b>FIGURE 5L</b>                        |                          |  |  |
| R6/2-Chol vs R6/2-ACSF                  |                          |  |  |
| Unpaired t test with Welch's correction |                          |  |  |
| P value                                 | 0,1594                   |  |  |
| P value summary                         | ns                       |  |  |
| Significantly different? (P < 0.05)     | No                       |  |  |
| One- or two-tailed P value?             | Two-tailed               |  |  |
| Welch-corrected t, df                   | t=1,689 df=4,430         |  |  |
| How big is the difference?              |                          |  |  |
| Mean ± SEM of column A                  | 0,01035 ± 0,001016, n=5  |  |  |
| Mean ± SEM of column B                  | 0,00859 ± 0,0002371, n=4 |  |  |
| Difference between means                | -0,001762 ± 0,001043     |  |  |
| 95% confidence interval                 | -0,004550 to 0,001026    |  |  |
| R squared                               | 0,3918                   |  |  |
| F test to compare variances             |                          |  |  |
| F,DFn, Dfd                              | 22,95, 4, 3              |  |  |

|                                     |        |  |  |
|-------------------------------------|--------|--|--|
| P value                             | 0,0276 |  |  |
| P value summary                     | *      |  |  |
| Significantly different? (P < 0.05) | Yes    |  |  |

|                                     |                         |  |  |
|-------------------------------------|-------------------------|--|--|
| <b>FIGURE 5M</b>                    |                         |  |  |
| R6/2-Chol vs R6/2-ACSF              |                         |  |  |
| Unpaired t test                     |                         |  |  |
| P value                             | 0,0481                  |  |  |
| P value summary                     | *                       |  |  |
| Significantly different? (P < 0.05) | Yes                     |  |  |
| One- or two-tailed P value?         | Two-tailed              |  |  |
| t, df                               | t=2,390 df=7            |  |  |
| How big is the difference?          |                         |  |  |
| Mean ± SEM of column A              | 0,01716 ± 0,002016, n=5 |  |  |
| Mean ± SEM of column B              | 0,01083 ± 0,001526, n=4 |  |  |
| Difference between means            | -0,006334 ± 0,002650    |  |  |
| 95% confidence interval             | -0,01260 to -6,843e-005 |  |  |
| R squared                           | 0,4494                  |  |  |
| F test to compare variances         |                         |  |  |
| F,DFn, Dfd                          | 2,183, 4, 3             |  |  |
| P value                             | 0,5473                  |  |  |
| P value summary                     | ns                      |  |  |
| Significantly different? (P < 0.05) | No                      |  |  |

|                                           |            |              |         |
|-------------------------------------------|------------|--------------|---------|
| <b>FIGURE 6B</b>                          |            |              |         |
| ANOVA summary                             |            |              |         |
| F                                         | 22,35      |              |         |
| P value                                   | <0,0001    |              |         |
| P value summary                           | ****       |              |         |
| Significant diff. among means (P < 0.05)? | Yes        |              |         |
| R squared                                 | 0,5828     |              |         |
| Newman-Keuls multiple comparisons test    |            |              |         |
|                                           | Mean Diff, | Significant? | Summary |
| wt vs. ACSF contralateral                 | -92,4      | Yes          | ****    |
| wt vs. ACSF infused                       | -98,63     | Yes          | ****    |
| wt vs. Chol contralateral                 | -92,4      | Yes          | ****    |
| wt vs. Chol infused                       | -104,3     | Yes          | ****    |
| ACSF contralateral vs. ACSF infused       | -6,231     | No           | ns      |
| ACSF contralateral vs. Chol contralateral | -0,00001   | No           | ns      |
| ACSF contralateral vs. Chol infused       | -11,86     | No           | ns      |
| ACSF infused vs. Chol contralateral       | 6,231      | No           | ns      |
| ACSF infused vs. Chol infused             | -5,625     | No           | ns      |
| Chol contralateral vs. Chol infused       | -11,86     | No           | ns      |

|                                           |            |              |         |
|-------------------------------------------|------------|--------------|---------|
| <b>FIGURE 6D</b>                          |            |              |         |
| ANOVA summary                             |            |              |         |
| F                                         | 16,24      |              |         |
| P value                                   | <0,0001    |              |         |
| P value summary                           | ****       |              |         |
| Significant diff. among means (P < 0.05)? | Yes        |              |         |
| R squared                                 | 0,5076     |              |         |
| Newman-Keuls multiple comparisons test    |            |              |         |
|                                           | Mean Diff, | Significant? | Summary |
| wt vs. ACSF contralateral                 | -91,86     | Yes          | ****    |
| wt vs. ACSF infused                       | -129,2     | Yes          | ****    |
| wt vs. Chol contralateral                 | -91,86     | Yes          | ****    |
| wt vs. Chol infused                       | -23,15     | No           | ns      |
| ACSF contralateral vs. ACSF infused       | -37,32     | No           | ns      |
| ACSF contralateral vs. Chol contralateral | 0,000008   | No           | ns      |
| ACSF contralateral vs. Chol infused       | 68,72      | Yes          | ***     |
| ACSF infused vs. Chol contralateral       | 37,32      | No           | ns      |
| ACSF infused vs. Chol infused             | 106        | Yes          | ****    |
| Chol contralateral vs. Chol infused       | 68,72      | Yes          | ***     |

## Appendix Figures Legends

### Appendix Figure S1 Electron microscopy analysis of myelin sheaths in wt and R6/2 groups.

(A) Representative EM images of myelinated fibers taken from the striatum of wt, R6/2, R6/2 ACSF and R6/2 chol-high (Scale bar: 500 nm). (B) Scatterplot graph of G-ratios against axonal diameters with linear regression. The slope of the best-fit line was significantly higher for R6/2 compared with wt mice, indicating thinner myelin sheaths in HD mice with and without treatment with cholesterol. (C) Mean G-ratios were higher in R6/2 mice compared with their wt controls, indicating that HD mice had thinner myelin sheaths (\*\*\* $p < 0.001$ ). At least 300 axons in 3 mice group were subjected to G-ratio analysis. Statistics: one-way ANOVA with Newman–Keuls post-hoc test (\* $p < 0.05$ ; \*\* $p < 0.01$ ; \*\*\* $p < 0.001$ ). (D) Representative EM images of myelinated fibers taken from the corpus callosum of wt, R6/2, R6/2 ACSF and R6/2 chol-high (Scale bar: 500 nm). (E) Scatterplot graph of G-ratios against axonal diameters with linear regression. The slope of the best-fit line was significantly higher for R6/2 compared with wt mice, indicating thinner myelin sheaths in HD mice with and without treatment with cholesterol. (F) Mean G-ratios were higher in R6/2 mice compared with their wt controls, indicating that HD mice had thinner myelin sheaths (\*\*\* $P < 0.001$ ). At least 300 axons in 3 mice group were subjected to G-ratio analysis. Error bars represent the standard error of the mean. Statistics: one-way ANOVA with Newman–Keuls post-hoc test (\* $p < 0.05$ ; \*\* $p < 0.01$ ; \*\*\* $p < 0.001$ ). (G) Representative EM images of myelinated fibers and its magnification taken from the striatum of wt mice in which the major dense lines in the myelin sheath are indicated. Periodicity was measured as the mean distance between two major dense lines from at least 45 randomly chosen myelin sheaths in 3 mice group. (Scale bars: 30 nm and 10 nm). (H-I) Quantification of the mean periodicity in wt, R6/2, R6/2 ACSF and R6/2 chol-high mice. Error bars represent the standard error of the mean. Statistics: one-way ANOVA with Newman–Keuls post-hoc test (\* $p < 0.05$ ; \*\* $p < 0.01$ ; \*\*\* $p < 0.001$ ).

**Appendix Figure S2 MuHTT aggregates in the striatum, cortex and hippocampus of R6/2 chol-high mice.**

(A–F) Zoom of representative confocal images of immunostaining against EM48 antibody, specific for muHTT aggregates, in the infused and the contralateral striatum (A), cortex (C) and hippocampus (E) of R6/2 chol-high mice (N=3) and relative quantification (B, D, F) of number of aggregates. Hoechst (Ho, blue) was used to counterstain nuclei. Scale bars in A, C, E: 10  $\mu$ m. 18 images/animal were analyzed from 9 sections throughout the entire striatum; 10 images for each animal were analyzed from 3 sections of the cortex; 6 images for each animal/condition were analyzed from 3 sections of the hippocampus. All values are expressed as % above the mean of aggregates in the contralateral tissue of R6/2 chol-high mice. The data are shown as scatterplot graphs with means $\pm$ standard. Each dot corresponding to number of aggregates counted in all the images. Statistics: one-way ANOVA with Newman–Keuls post- hoc test (\*p<0.05; \*\*p<0.01; \*\*\*p<0.001).
